# Supplementary material
Source: PubMed Central journal article supplement (PMC152283)
Supplement: pnas_0437791100_2.pdf [file pnas_0437791100_2.pdf]

A

G<sub>1</sub>/Early S

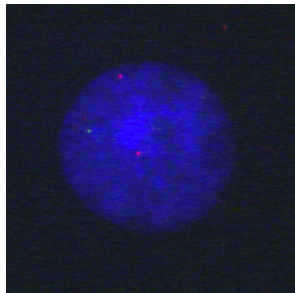

2 RHO  
1 DHFR

B

S-Phase

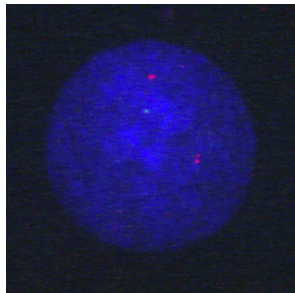

3 RHO  
1 DHFR

C

S-Phase

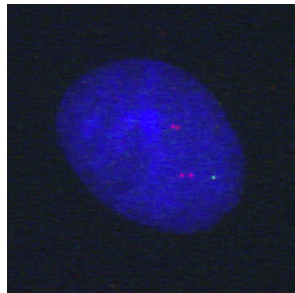

4 RHO  
1 DHFR

D

S-Phase

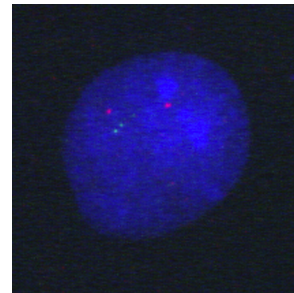

2 RHO  
2 DHFR

E

S-Phase

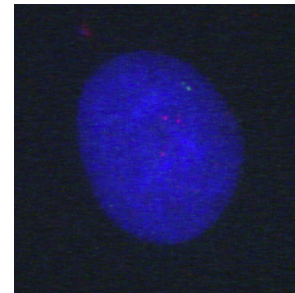

3 RHO  
2 DHFR

F

Late S/G<sub>2</sub>

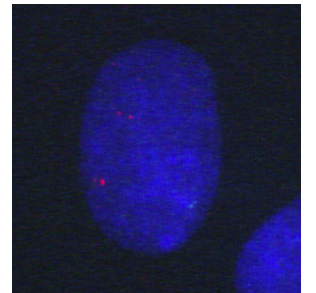

4 RHO  
2 DHFR
